# Supplementary material for: Predictors of correct technique in patients using pressurized metered dose inhalers
Source: Springer Nature journal article supplement (doi:10.1186/s12890-017-0386-6), 2017-02-28
Supplement: MOESM2 [file 12101140]

**Do you currently smoke tobacco:**            on a daily basis    less than daily            not at all

**How many cigarettes do you smoke on a daily basis:**            0-5    5-10    10-20    20-40    >40

**For how many years have you smoked:**    0-5    5-10    10-20    20-40    >40 years

**If you currently do not smoke, have you ever smoked**            Yes            No

**If yes:**    on a daily basis            less than daily

**How many cigarettes did you smoke on a daily basis:**            0-5    5-10    10-20    20-40    >40

**For how many years did you smoke:**    0-5    5-10    10-20    20-40    >40 years

**At what age did you quit:**            \_\_\_\_\_

**Do you suffer from allergic rhinitis?**            Yes    No

**Have you ever had allergy skin tests done?**            Yes    No

**Have you ever had allergy blood tests done?**            Yes    No

**What did the results show?**            Yes I am allergic to \_\_\_\_\_            I do not have any allergies

**Do you suffer from any other co-morbidities?**

Hypertension            Hyperlipidaemia            Diabetes            Heart disease            Stroke

Other: \_\_\_\_\_

**Do you take the influenza vaccine every year?**    Yes    No            **In the last year?**    Yes    No

**Did you ever take the Pneumococcal vaccine?**            Yes            No

**Have you ever read/watched the inhaler technique explanation on:**

Leaflet            Book            Magazine            Television            Internet

**From 1 to 10 how would you grade your inhaler technique (10 being the best)?**            \_\_\_\_\_

**How do you rate the use of inhalers?**    Very easy    Easy    Normal    Difficult    Very difficult

**How beneficial is the inhaler on your breathing?**    Very effective            Effective            Not effective

**Do you have any concerns regarding possible side effects of your treatment?**            Yes            No

**If yes, which ones:**            \_\_\_\_\_

**Do you rinse your mouth after using the yellow/brown/orange inhaler?**    Yes    No    NA

**Does any other person in your household use inhalers?**    Yes            No

**To be filled in by doctor/medical student:**

**What inhalers does the patient use?**            pMDI            Aeroliser

**Does the patient use a spacer?**            Yes            No

**Score for inhaler technique:**

pMDI + spacer    /12            pMDI            /12            Aeroliser            /14

Last FEV1:
